# Supplementary material
Source: Springer Nature journal article supplement (https://www.springermedizin.de/resource/supplementary/12974_2011_336_MOESM1_ESM.pdf/9601440)

Normal

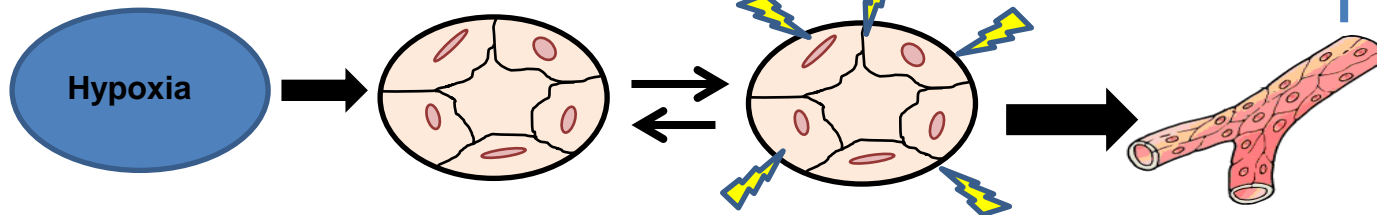

AD

Hypoxia  
and  
???

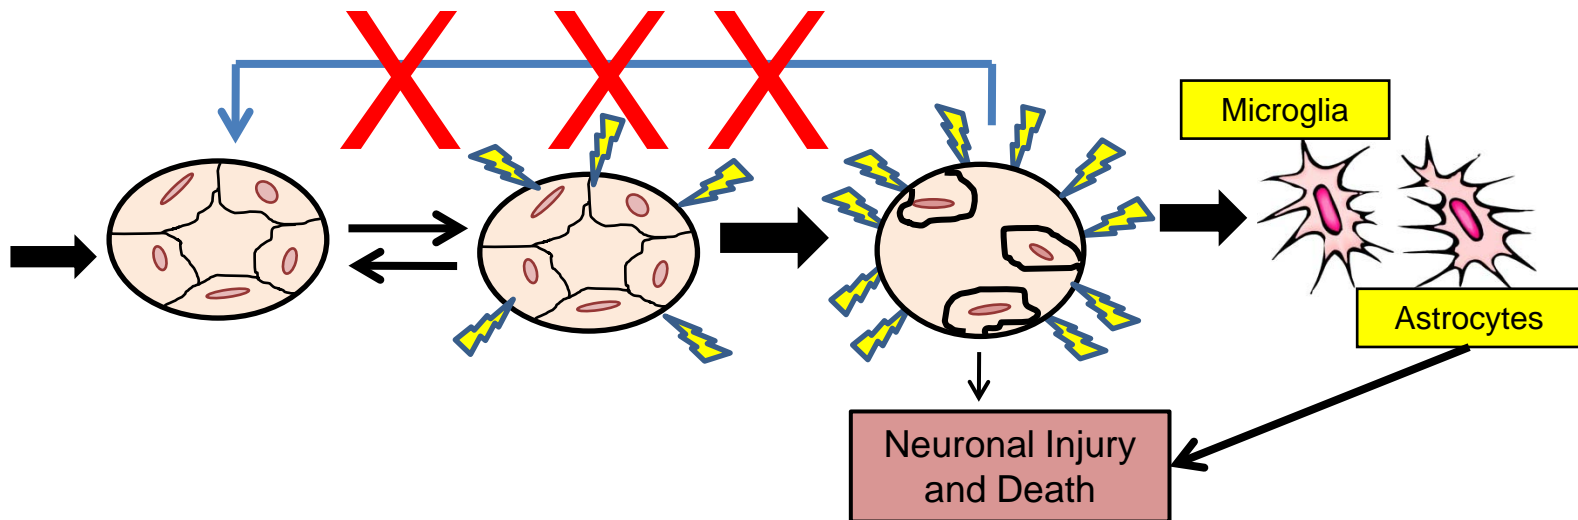

Supplement: MOESM1 [file 9601440]
